# Supplementary material for: The Humble Leader: Association of Discrepancies in Leader and Follower Ratings of Implementation Leadership With Organizational Climate in Mental Health
Source: Atypon-hosted journal article supplement (doi:10.1176/appi.ps.201600062), 2016-10-03
Supplement: appi.ps.201600062.ds001.pdf [file appi.ps.201600062.ds001.pdf]

 


Psychiatry Online
