# Supplementary material for: The Humble Leader: Association of Discrepancies in Leader and Follower Ratings of Implementation Leadership With Organizational Climate in Mental Health
Source: Atypon-hosted journal article supplement (doi:10.1176/appi.ps.201600062), 2016-10-03
Supplement: appi.ps.201600062.ds001.pdf [file appi.ps.201600062.ds001.pdf]

TABLE 3. Polynomial Regression and Response Surface Analysis Results

| <b>OCM Involvement and Implementation Leadership</b>          |          |           |
|---------------------------------------------------------------|----------|-----------|
| Variable Regressed onto OCM Involvement                       | <i>b</i> | <i>se</i> |
| Constant                                                      | 1.56**   | .10       |
| Implementation Leadership: Leader                             | -.09     | .06       |
| Implementation Leadership: Team                               | .21**    | .07       |
| Implementation Leadership: Leader squared                     | .23**    | .07       |
| Implementation Leadership: Leader x Team                      | -.10*    | .04       |
| Implementation Leadership: Team squared                       | .09      | .10       |
| <i>R</i> <sup>2</sup>                                         | .18      |           |
| Response Surface Tests                                        |          |           |
| <i>a</i> <sub>1</sub>                                         | .12      | .10       |
| <i>a</i> <sub>2</sub>                                         | .22**    | .08       |
| <i>a</i> <sub>3</sub>                                         | -.30**   | .10       |
| <i>a</i> <sub>4</sub>                                         | .42**    | .12       |
| <b>OCM Performance Feedback and Implementation Leadership</b> |          |           |
| Variable Regressed onto OCM Performance Feedback              | <i>b</i> | <i>se</i> |
| Constant                                                      | 1.69**   | .07       |
| Implementation Leadership: Leader                             | -.11*    | .05       |
| Implementation Leadership: Team                               | .27**    | .56       |
| Implementation Leadership: Leader squared                     | .27**    | .06       |
| Implementation Leadership: Leader x Team                      | -.12**   | .03       |
| Implementation Leadership: Team squared                       | .09      | .07       |
| <i>R</i> <sup>2</sup>                                         | .37      |           |
| Response Surface Tests                                        |          |           |
| <i>a</i> <sub>1</sub>                                         | .16*     | .07       |
| <i>a</i> <sub>2</sub>                                         | .23**    | .08       |
| <i>a</i> <sub>3</sub>                                         | -.37**   | .07       |
| <i>a</i> <sub>4</sub>                                         | .47**    | .08       |

Note: N=80; \* p&lt;.05, \*\* p&lt;.01
